# Supplementary material
Source: bioRxiv or medRxiv preprint supplement (https://www.biorxiv.org/highwire/filestream/94184/field_highwire_adjunct_files/0/306266-1.pdf)

Supplementary Fig 1.

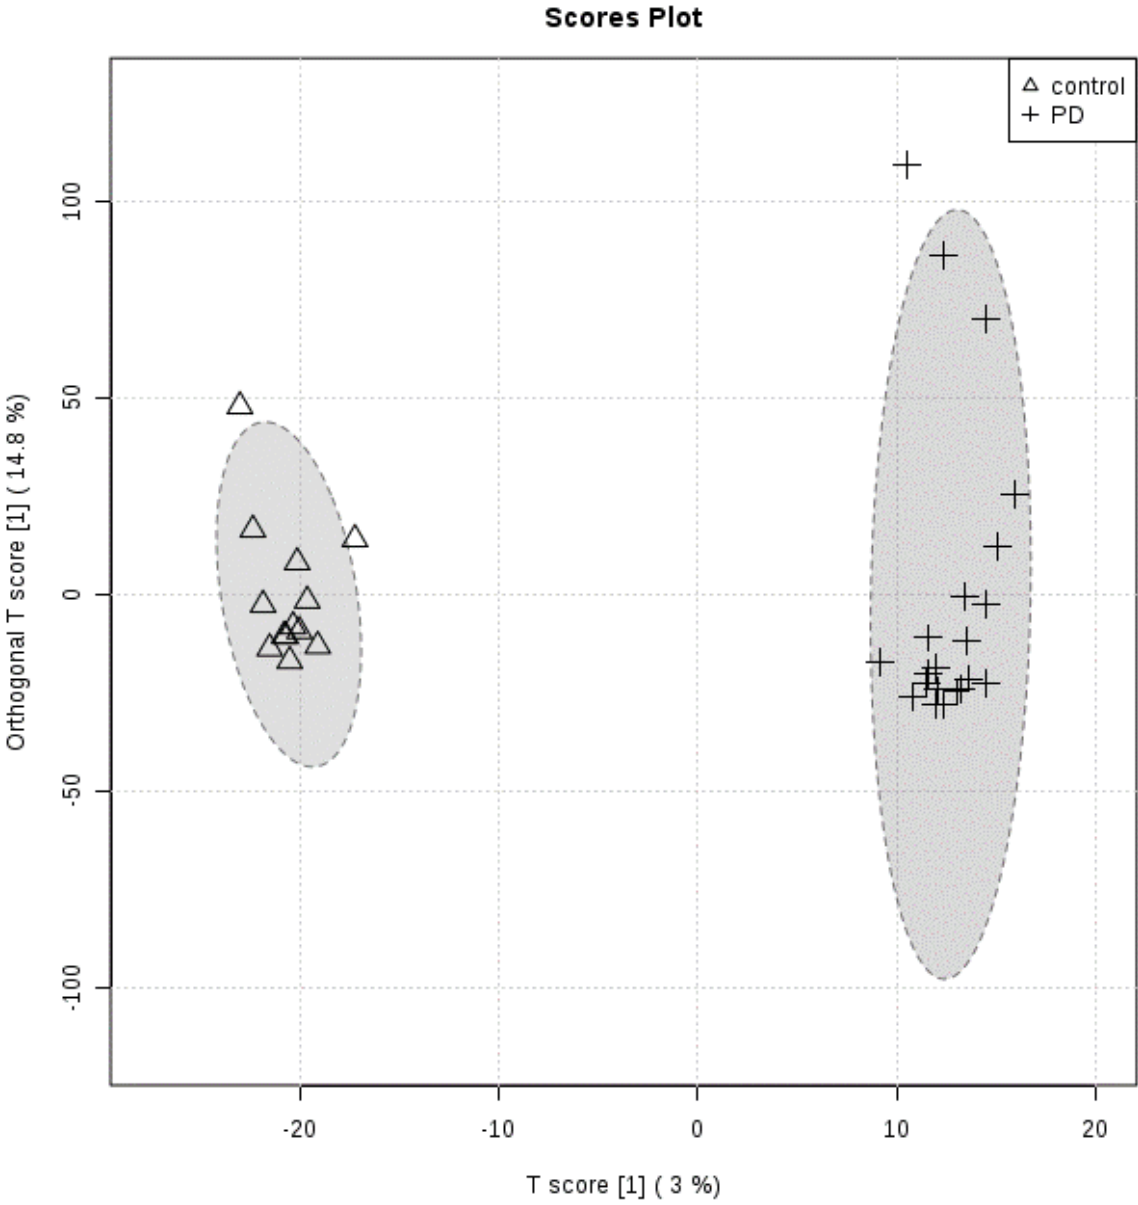

Supplement: Supplementary file [file 306266-1.pdf]
